# Supplementary material for: Does bullying occur in preschool? A survey of French preschool workers’ perceptions and beliefs about bullying
Source: Research Square preprint supplement (doi:10.21203/rs.3.rs-5716629/v1), 2025-01-20
Supplement: Supplementary file 1 [file 309b3873062210a97693acd8.docx]

**Supplementary materials**

**Supplementary table 1. Participants’ age for each group**

| **Profession** | **Age range** | | | | | | | | | |
| --- | --- | --- | --- | --- | --- | --- | --- | --- | --- | --- |
| **< 20** | % | **20-30** | % | **31-40** | % | **41-50** | % | **> 50** | % |
| Preschool teachers, preschool directors | **1** | 0.96 | **21** | 20.19 | **31** | 29.81 | **29** | 27.88 | **22** | 21.15 |
| After-school facilitators, after-school directors | **2** | 2.86 | **18** | 25.71 | **21** | 30 | **17** | 23.94 | **13** | 18.57 |
| Nursery school assistant | **0** | 0 | **1** | 6.25 | **3** | 18.75 | **4** | 25 | **8** | 50 |
| **Total** | **3** | 1.57 | **40** | 20.94 | **55** | 28.8 | **50** | 26.18 | **43** | 22.51 |

**Supplementary table 2. Participants’ gender for each group (male participants)**

| **Profession** | **N** | **%** |
| --- | --- | --- |
|
| Preschool teachers, preschool directors | 14 | 13.46 |
| After-school facilitators, after-school directors | 20 | 28.16 |
| Nursery school assistant | 0 | 0 |
| **Total** | **34** |  |

**Supplementary table 3. Participants’ years of professional experience for each group**

| **Profession** | **Years of professional experience** | | | | | | | |
| --- | --- | --- | --- | --- | --- | --- | --- | --- |
| **< 1** | % | **1-5** | % | **5-10** | % | **> 10** | % |
| Preschool teachers, preschool directors | **7** | 6.3 | **24** | 23.08 | **20** | 19.23 | **53** | 50.96 |
| After-school facilitators, after-school directors | **3** | 4.29 | **15** | 21.43 | **16** | 22.86 | **37** | 52.11 |
| Nursery school assistant | **3** | 18.75 | **1** | 6.25 | **6** | 37.5 | **6** | 37.5 |
| **Total** | **13** | 6.81 | **40** | 20.94 | **42** | 21.99 | **96** | 50.26 |

**Questionnaire for preschool staff:**

1. **Definition of bullying**

**Do you believe there is a difference between bullying and teasing?**

- Yes
- No
- Don’t know

***I believe bullying is when* ………**

*(tick none, one or more boxes)*

- A child is occasionally teased by other children
- A child is often teased by other children
- A child is occasionally not allowed to participate in a game/activity
- A child is often not allowed to participate in a game/activity
- A child plays a game/undertakes an activity alone when they don’t want to be doing it alone
- A child is occasionally called nasty names by other children
- A child is often called nasty names by other children
- A child is occasionally hit, pushed, bitten or the like
- A child is often hit, pushed, bitten or the like
- A child is occasionally ignored or excluded in other ways
- A child is often ignored or excluded in other ways

**Describe in your own words what you *interpret* as bullying. Just write what immediately comes to mind:**

___________________________________________________________________________

___________________________________________________________________________

__________________________________________________________________________

___________________________________________________________________________

1. **Description of bullying and exclusion phenomena among preschool students**

**Do some of the children in your preschool intimidate each other?**

- Never
- Rarely
- Sometimes
- Often

**In what ways do the children usually intimidate each other? Describe in your own words:**

_________________________________________________________________________________________________________________________________________________________________________________________________________________________________

**Do all of the children in your preschool have playmates, or is anyone left out?**

- Yes, they all have someone to play with
- There are certain children who occasionally do not have someone to play with
- There are certain children who are often not included in games
- There are certain children who are never allowed to join in games

| *Please discuss orally your experiences of preschool bullying.* |
| --- |

1. **Description of the positioning of staff and parents**

**Some people believe that children mimic the social conventions of adults, and that bullying among staff at the institution can therefore “rub off on” the children. In your experience, does bullying – or a bad tone – exist among staff members at your preschool?**

- Yes, frequently
- Yes, occasionally
- Yes, but rarely
- No

**Do you feel that all members of staff speak to the children in an appropriate manner?**

- Yes, always
- Yes, mostly
- No, there are some specific staff members who *frequently* do not speak to the children in an
- appropriate manner
- No, there are several staff members who *frequently* do not speak to the children in an appropriate manner

**How would you rate your collaboration with parents?**

- Very positive
- Mainly positive
- Mainly negative
- Very negative

1. **Bullying prevention**

**You are about to get involved in the anti-bullying program Free of Bullying. Has your preschool focused on bullying in the past?** (*tick one or more boxes*)

- No
- Yes, in connection with one or more specific incidents
- Yes, we have discussed bullying at staff meetings
- Yes, bullying is included in our curriculum
- Yes, we have raised bullying at meetings with the parents
- Yes, we have clear guidelines in place outlining what we need to do if we encounter bullying

**Are there any areas that you feel you and your colleagues could improve in respect of how you deal with conflict and teasing among the children?**

- Don’t know
- No
- Yes

*If yes, briefly describe which areas could be improved:*

______________________________________________________________________________________________________________________________________________________

**Who is responsible for any bullying that takes place among the children?**

*(tick one or more boxes)*

- The individual child
- The children’s group
- The parents
- The teachers
- The preschool management
- Others. *State who*:_____________________________________________
- No-one
- Don’t know

**Free of Bullying is about *preventing* bullying before it occurs. Do you believe that bullying can be prevented?**

- Definitely
- Probably
- Don’t know
- Probably not
- Definitely not

**Question 19: What do you believe *could be done* to prevent bullying? Just write what immediately comes to mind.**

_____________________________________________________________________________________________________________________________________________________

___________________________________________________________________________

___________________________________________________________________________

**Do you believe that parents can take steps to prevent bullying?**

- Definitely
- Maybe
- No

**What do you think will be the biggest challenge to working with Free of Bullying?**

_____________________________________________________________________________________________________________________________________________________

___________________________________________________________________________

__________________________________________________________________________

___________________________________________________________________________
